# Supplementary material for: BIITE: A Tool to Determine HLA Class II Epitopes from T Cell ELISpot Data
Source: PLoS Comput Biol. 2016 Mar 8;12(3):e1004796. doi: 10.1371/journal.pcbi.1004796 (PMC4783075; doi:10.1371/journal.pcbi.1004796)
Supplement: S7 Table — Peptide:HLA combinations in the ‘concise results’ of RATE. Green highlighted alleles were detected by BIITE, while red highlighted alleles are probably not immunogenic in combination with the peptide, but appear to be so because of linkage disequilibrium. (XLSX) [file pcbi.1004796.s012.xlsx]

## Sheet: 2015-11-23_1448295821_iedb-rate
Peptide#	peptide_seq	Allele#	Allele	A+R+	A-R+	A+R-	A-R-	No_of_Donors	Response_n/a	Relative_freq	Odds_ratio	P-value
1	NDIQKLVGKLNWASQIY	53	B67	1	11	4	615	631	0	10.5167	13.9773	0.0918191
1	NDIQKLVGKLNWASQIY	13	A3002	9	3	58	561	631	0	7.06343	29.0172	1.7521e-07
1	NDIQKLVGKLNWASQIY	62	C05	1	11	8	611	631	0	5.84259	6.94318	0.159637
1	NDIQKLVGKLNWASQIY	66	C12	2	10	28	591	631	0	3.50556	4.22143	0.107277	in linkage with A30
1	NDIQKLVGKLNWASQIY	36	B39	2	10	29	590	631	0	3.39247	4.06897	0.113469
1	NDIQKLVGKLNWASQIY	39	B42	7	5	133	486	631	0	2.62917	5.11579	0.0066673
1	NDIQKLVGKLNWASQIY	11	A30	2	10	39	580	631	0	2.56504	2.97436	0.180053
1	NDIQKLVGKLNWASQIY	70	C17	7	5	145	474	631	0	2.4216	4.57655	0.0108305
2	TKELQKQIIKIQNFRVYY	4	A07	1	25	0	605	631	0	24.2692	inf	0.0412044
2	TKELQKQIIKIQNFRVYY	25	B02	1	25	0	605	631	0	24.2692	inf	0.0412044
2	TKELQKQIIKIQNFRVYY	13	A3002	18	8	49	556	631	0	6.52009	25.5306	2.52609e-13
2	TKELQKQIIKIQNFRVYY	44	B50	1	25	3	602	631	0	6.06731	8.02667	0.155254
2	TKELQKQIIKIQNFRVYY	58	C01	1	25	3	602	631	0	6.06731	8.02667	0.155254
2	TKELQKQIIKIQNFRVYY	43	B49	2	24	7	598	631	0	5.39316	7.11905	0.0492066
2	TKELQKQIIKIQNFRVYY	41	B45	5	21	37	568	631	0	2.88919	3.65508	0.0236832
2	TKELQKQIIKIQNFRVYY	20	A43	3	23	27	578	631	0	2.42692	2.79227	0.120357
2	TKELQKQIIKIQNFRVYY	66	C12	3	23	27	578	631	0	2.42692	2.79227	0.120357	in linkage with A30
2	TKELQKQIIKIQNFRVYY	24	A80	1	25	9	596	631	0	2.42692	2.64889	0.345491
2	TKELQKQIIKIQNFRVYY	11	A30	4	22	37	568	631	0	2.36773	2.79115	0.0807562
2	TKELQKQIIKIQNFRVYY	36	B39	3	23	28	577	631	0	2.34864	2.68789	0.129682
2	TKELQKQIIKIQNFRVYY	69	C16	6	20	62	543	631	0	2.1414	2.62742	0.0505302
3	SKLNWASQIYPGIKVRQL	37	B40	1	33	4	593	631	0	3.71176	4.49242	0.24259
3	SKLNWASQIYPGIKVRQL	39	B42	21	13	119	478	631	0	2.78382	6.48869	3.34561e-07
3	SKLNWASQIYPGIKVRQL	70	C17	22	12	130	467	631	0	2.68615	6.5859	2.5609e-07	strong linkage with B42
3	SKLNWASQIYPGIKVRQL	35	B35	3	31	23	574	631	0	2.1414	2.41515	0.159163
3	SKLNWASQIYPGIKVRQL	28	B13	3	31	24	573	631	0	2.06209	2.31048	0.17269
3	SKLNWASQIYPGIKVRQL	62	C05	1	33	8	589	631	0	2.06209	2.23106	0.394547
4	IKIQNFRVYYRDSRDPIW	4	A07	1	39	0	591	631	0	15.775	inf	0.0633914
4	IKIQNFRVYYRDSRDPIW	25	B02	1	39	0	591	631	0	15.775	inf	0.0633914
4	IKIQNFRVYYRDSRDPIW	58	C01	2	38	2	589	631	0	7.8875	15.5	0.0216907
4	IKIQNFRVYYRDSRDPIW	13	A3002	24	16	43	548	631	0	5.65075	19.1163	1.19057e-15
4	IKIQNFRVYYRDSRDPIW	44	B50	1	39	3	588	631	0	3.94375	5.02564	0.230955
4	IKIQNFRVYYRDSRDPIW	20	A43	6	34	24	567	631	0	3.155	4.16912	0.00843357
4	IKIQNFRVYYRDSRDPIW	11	A30	8	32	33	558	631	0	3.07805	4.22727	0.00258549
4	IKIQNFRVYYRDSRDPIW	41	B45	7	33	35	556	631	0	2.62917	3.3697	0.0123413
4	IKIQNFRVYYRDSRDPIW	66	C12	4	36	26	565	631	0	2.10333	2.41453	0.114423	in linkage with A30
4	IKIQNFRVYYRDSRDPIW	36	B39	4	36	27	564	631	0	2.03548	2.32099	0.125516	in linkage with A30
5	TGTEELRSLYNTVATLY	4	A07	1	95	0	535	631	0	6.57292	inf	0.152139
5	TGTEELRSLYNTVATLY	25	B02	1	95	0	535	631	0	6.57292	inf	0.152139
5	TGTEELRSLYNTVATLY	67	C14	3	93	2	533	631	0	3.94375	8.59677	0.027116
5	TGTEELRSLYNTVATLY	13	A3002	30	66	37	498	631	0	2.9431	6.11794	5.07651e-10
5	TGTEELRSLYNTVATLY	41	B45	15	81	27	508	631	0	2.34747	3.48422	0.000547375	also identified by BIITE, not in LANL DB
5	TGTEELRSLYNTVATLY	10	A29	38	58	69	466	631	0	2.33431	4.42479	8.10496e-09
5	TGTEELRSLYNTVATLY	5	A11	1	95	2	533	631	0	2.19097	2.80526	0.391022
6	GIWQLDCTHLEGKIILVA	14	A31	1	26	3	601	631	0	5.84259	7.70513	0.16084
6	GIWQLDCTHLEGKIILVA	32	B1510	24	3	79	525	631	0	5.44552	53.1646	2.12701e-17
6	GIWQLDCTHLEGKIILVA	53	B67	1	26	4	600	631	0	4.67407	5.76923	0.196976
6	GIWQLDCTHLEGKIILVA	60	C03	13	14	75	529	631	0	3.45244	6.54952	1.25513e-05	strong linkage with B1510
6	GIWQLDCTHLEGKIILVA	8	A26	2	25	13	591	631	0	3.11605	3.63692	0.131434
6	GIWQLDCTHLEGKIILVA	69	C16	9	18	59	545	631	0	3.09314	4.61864	0.00111643
6	GIWQLDCTHLEGKIILVA	45	B51	1	26	7	597	631	0	2.9213	3.28022	0.296617
6	GIWQLDCTHLEGKIILVA	62	C05	1	26	8	596	631	0	2.59671	2.86538	0.3271
6	GIWQLDCTHLEGKIILVA	65	C08	7	20	66	538	631	0	2.24099	2.85303	0.0273858
6	GIWQLDCTHLEGKIILVA	3	A03	9	18	85	519	631	0	2.23759	3.05294	0.0114292
7	GGHQAAMQMLKDTINEEA	14	A31	1	27	3	600	631	0	5.63393	7.40741	0.166397
7	GGHQAAMQMLKDTINEEA	37	B40	1	27	4	599	631	0	4.50714	5.5463	0.203623
7	GGHQAAMQMLKDTINEEA	57	B82	1	27	4	599	631	0	4.50714	5.5463	0.203623
7	GGHQAAMQMLKDTINEEA	32	B1510	13	15	90	513	631	0	2.84431	4.94	0.000125899
7	GGHQAAMQMLKDTINEEA	50	B58	1	27	7	596	631	0	2.81696	3.15344	0.305933
7	GGHQAAMQMLKDTINEEA	11	A30	4	24	37	566	631	0	2.19861	2.54955	0.100658
7	GGHQAAMQMLKDTINEEA	65	C08	7	21	66	537	631	0	2.16096	2.71212	0.0331773	linkage with B1510
7	GGHQAAMQMLKDTINEEA	29	B14	4	24	39	564	631	0	2.09635	2.41026	0.115349
7	GGHQAAMQMLKDTINEEA	60	C03	8	20	80	523	631	0	2.0487	2.615	0.043517	strong linkage with B1510
8	LQTGERDWHLGHGVSIEW	9	A28	1	65	0	565	631	0	9.56061	inf	0.104596
8	LQTGERDWHLGHGVSIEW	32	B1510	52	14	51	514	631	0	4.82671	37.4342	2.98601e-34
8	LQTGERDWHLGHGVSIEW	14	A31	2	64	2	563	631	0	4.7803	8.79688	0.056296
8	LQTGERDWHLGHGVSIEW	69	C16	21	45	47	518	631	0	2.95254	5.14326	5.43501e-07	linkage with B1510
8	LQTGERDWHLGHGVSIEW	8	A26	4	62	11	554	631	0	2.54949	3.24927	0.0614675
8	LQTGERDWHLGHGVSIEW	60	C03	22	44	66	499	631	0	2.39015	3.7803	1.57605e-05	strong linkage with B1510
8	LQTGERDWHLGHGVSIEW	49	B57	9	57	31	534	631	0	2.15114	2.71986	0.0271124
8	LQTGERDWHLGHGVSIEW	65	C08	16	50	57	508	631	0	2.09548	2.85193	0.00183358	linkage with B1510
8	LQTGERDWHLGHGVSIEW	30	B15	7	59	26	539	631	0	2.02801	2.45958	0.0700796
9	NTMLNTVGGHQAAMQMLK	5	A11	1	13	2	615	631	0	15.0238	23.6538	0.0651963
9	NTMLNTVGGHQAAMQMLK	18	A36	1	13	7	610	631	0	5.63393	6.7033	0.165155
9	NTMLNTVGGHQAAMQMLK	32	B1510	8	6	95	522	631	0	3.50069	7.32632	0.000500523
9	NTMLNTVGGHQAAMQMLK	29	B14	3	11	40	577	631	0	3.14452	3.93409	0.0633057
9	NTMLNTVGGHQAAMQMLK	60	C03	6	8	82	535	631	0	3.07305	4.89329	0.00735739	strong linkage with B1510
9	NTMLNTVGGHQAAMQMLK	30	B15	2	12	31	586	631	0	2.7316	3.15054	0.163071
9	NTMLNTVGGHQAAMQMLK	26	B07	3	11	61	556	631	0	2.11272	2.48584	0.161364
10	QMVHQAISPRTLNAWVKV	14	A31	1	33	3	594	631	0	4.63971	6	0.199164
10	QMVHQAISPRTLNAWVKV	32	B1510	22	12	81	516	631	0	3.96402	11.679	6.56538e-11
10	QMVHQAISPRTLNAWVKV	54	B71	1	33	4	593	631	0	3.71176	4.49242	0.24259
10	QMVHQAISPRTLNAWVKV	60	C03	14	20	74	523	631	0	2.95254	4.9473	5.18412e-05	strong linkage with B1510
10	QMVHQAISPRTLNAWVKV	8	A26	2	32	13	584	631	0	2.47451	2.80769	0.191008
10	QMVHQAISPRTLNAWVKV	18	A36	1	33	7	590	631	0	2.31985	2.55411	0.359597
10	QMVHQAISPRTLNAWVKV	45	B51	1	33	7	590	631	0	2.31985	2.55411	0.359597
10	QMVHQAISPRTLNAWVKV	65	C08	9	25	64	533	631	0	2.28807	2.99812	0.0107906	linkage with B1510
10	QMVHQAISPRTLNAWVKV	47	B53	3	31	24	573	631	0	2.06209	2.31048	0.17269
11	QGYFPDWQNYTPGPGVRY	4	A07	1	53	0	577	631	0	11.6852	inf	0.0855784
11	QGYFPDWQNYTPGPGVRY	25	B02	1	53	0	577	631	0	11.6852	inf	0.0855784
11	QGYFPDWQNYTPGPGVRY	35	B35	14	40	12	565	631	0	6.29202	16.4792	9.36853e-10
11	QGYFPDWQNYTPGPGVRY	45	B51	2	52	6	571	631	0	2.9213	3.66026	0.144252
11	QGYFPDWQNYTPGPGVRY	14	A31	1	53	3	574	631	0	2.9213	3.61006	0.301449
11	QGYFPDWQNYTPGPGVRY	58	C01	1	53	3	574	631	0	2.9213	3.61006	0.301449
11	QGYFPDWQNYTPGPGVRY	53	B67	1	53	4	573	631	0	2.33704	2.70283	0.361612
12	QITLWQRPLVSIKVGGQI	37	B40	1	12	4	614	631	0	9.70769	12.7917	0.0991549
12	QITLWQRPLVSIKVGGQI	67	C14	1	12	4	614	631	0	9.70769	12.7917	0.0991549
12	QITLWQRPLVSIKVGGQI	66	C12	4	9	26	592	631	0	6.47179	10.1197	0.00221097
12	QITLWQRPLVSIKVGGQI	36	B39	4	9	27	591	631	0	6.26303	9.7284	0.00250874
12	QITLWQRPLVSIKVGGQI	45	B51	1	12	7	611	631	0	6.06731	7.27381	0.154207
12	QITLWQRPLVSIKVGGQI	68	C15	1	12	11	607	631	0	4.04487	4.59848	0.222784
12	QITLWQRPLVSIKVGGQI	65	C08	5	8	68	550	631	0	3.32455	5.05515	0.0110796
12	QITLWQRPLVSIKVGGQI	56	B81	4	9	66	552	631	0	2.77363	3.71717	0.0458127
12	QITLWQRPLVSIKVGGQI	29	B14	2	11	41	577	631	0	2.2576	2.55876	0.219961
12	QITLWQRPLVSIKVGGQI	21	A66	3	10	66	552	631	0	2.11037	2.50909	0.161172
13	QLEKEPIAGAETFYVDGA	35	B35	7	35	19	570	631	0	4.04487	6	0.000888229
13	QLEKEPIAGAETFYVDGA	14	A31	1	41	3	586	631	0	3.75595	4.76423	0.241338
13	QLEKEPIAGAETFYVDGA	44	B50	1	41	3	586	631	0	3.75595	4.76423	0.241338
13	QLEKEPIAGAETFYVDGA	37	B40	1	41	4	585	631	0	3.00476	3.56707	0.292158
13	QLEKEPIAGAETFYVDGA	22	A68	30	12	133	456	631	0	2.76512	8.57143	1.62319e-10
13	QLEKEPIAGAETFYVDGA	47	B53	4	38	23	566	631	0	2.22575	2.59039	0.0970453
13	QLEKEPIAGAETFYVDGA	41	B45	6	36	36	553	631	0	2.14626	2.56019	0.0517511
13	QLEKEPIAGAETFYVDGA	29	B14	6	36	37	552	631	0	2.09635	2.48649	0.057175
13	QLEKEPIAGAETFYVDGA	65	C08	10	32	63	526	631	0	2.05806	2.60913	0.0204997
13	QLEKEPIAGAETFYVDGA	32	B1510	14	28	89	500	631	0	2.04207	2.80899	0.00430292	linkage with A68
14	GLGQYIYETYGDTWTGV	53	B67	2	51	3	575	631	0	4.76226	7.51634	0.058743
14	GLGQYIYETYGDTWTGV	38	B41	4	49	9	569	631	0	3.66328	5.161	0.0179669
14	GLGQYIYETYGDTWTGV	22	A68	46	7	117	461	631	0	3.35988	25.8926	1.4262e-22
14	GLGQYIYETYGDTWTGV	68	C15	3	50	9	569	631	0	2.97642	3.79333	0.0715728
14	GLGQYIYETYGDTWTGV	60	C03	17	36	71	507	631	0	2.29996	3.37207	0.000313927	strong linkage with A68
14	GLGQYIYETYGDTWTGV	26	B07	12	41	52	526	631	0	2.23231	2.9606	0.00667651
15	ETYGDTWTGVEALIRIL	53	B67	2	44	3	582	631	0	5.48696	8.81818	0.0451539
15	ETYGDTWTGVEALIRIL	22	A68	41	5	122	463	631	0	3.45039	31.1197	5.35556e-21
15	ETYGDTWTGVEALIRIL	38	B41	3	43	10	575	631	0	3.16555	4.01163	0.0618703
15	ETYGDTWTGVEALIRIL	57	B82	1	45	4	581	631	0	2.74348	3.22778	0.315949
15	ETYGDTWTGVEALIRIL	60	C03	16	30	72	513	631	0	2.49407	3.8	0.000164073	strong linkage with A68
15	ETYGDTWTGVEALIRIL	68	C15	2	44	10	575	631	0	2.28623	2.61364	0.215619
15	ETYGDTWTGVEALIRIL	32	B1510	16	30	87	498	631	0	2.13086	3.05287	0.00135443	linkage with A68
16	GAETFYVDGAANRETKI	57	B82	3	123	2	503	631	0	3.00476	6.13415	0.0569449
16	GAETFYVDGAANRETKI	22	A68	85	41	78	427	631	0	2.6115	11.3493	2.51607e-29
16	GAETFYVDGAANRETKI	44	B50	2	124	2	503	631	0	2.50397	4.05645	0.179823
16	GAETFYVDGAANRETKI	21	A66	34	92	35	470	631	0	2.46768	4.96273	4.87449e-09
17	GIQQEFGIPYNPQSQGVV	5	A11	1	18	2	610	631	0	11.0702	16.9444	0.0877751
17	GIQQEFGIPYNPQSQGVV	45	B51	2	17	6	606	631	0	8.30263	11.8824	0.0216058
17	GIQQEFGIPYNPQSQGVV	30	B15	4	15	29	583	631	0	4.02552	5.36092	0.0137909
17	GIQQEFGIPYNPQSQGVV	68	C15	1	18	11	601	631	0	2.76754	3.03535	0.309384
17	GIQQEFGIPYNPQSQGVV	69	C16	5	14	63	549	631	0	2.44195	3.11224	0.0438992
17	GIQQEFGIPYNPQSQGVV	41	B45	3	16	39	573	631	0	2.37218	2.75481	0.126096
17	GIQQEFGIPYNPQSQGVV	31	B1503	7	12	107	505	631	0	2.03924	2.75312	0.0607124
18	YHCLVCFQTKGLGISYGR	5	A11	1	17	2	611	631	0	11.6852	17.9706	0.0832888
18	YHCLVCFQTKGLGISYGR	14	A31	1	17	3	610	631	0	8.76389	11.9608	0.109564
18	YHCLVCFQTKGLGISYGR	45	B51	1	17	7	606	631	0	4.38194	5.09244	0.20772
18	YHCLVCFQTKGLGISYGR	47	B53	3	15	24	589	631	0	3.89506	4.90833	0.0371175
18	YHCLVCFQTKGLGISYGR	20	A43	3	15	27	586	631	0	3.50556	4.34074	0.0488055
18	YHCLVCFQTKGLGISYGR	31	B1503	11	7	103	510	631	0	3.38255	7.78086	4.44308e-05
18	YHCLVCFQTKGLGISYGR	30	B15	3	15	30	583	631	0	3.18687	3.88667	0.0621329
18	YHCLVCFQTKGLGISYGR	59	C02	10	8	125	488	631	0	2.59671	4.88	0.00133756	strong linkage with B1503
18	YHCLVCFQTKGLGISYGR	8	A26	1	17	14	599	631	0	2.33704	2.51681	0.355369
19	VKAACWWAGIQQEFGIPY	55	B72	1	48	0	582	631	0	12.8776	inf	0.0776545
19	VKAACWWAGIQQEFGIPY	31	B1503	39	10	75	507	631	0	4.40548	26.364	4.65841e-23
19	VKAACWWAGIQQEFGIPY	5	A11	1	48	2	580	631	0	4.29252	6.04167	0.215656
19	VKAACWWAGIQQEFGIPY	59	C02	38	11	97	485	631	0	3.62479	17.2727	1.47035e-18	strong linkage with B1503
19	VKAACWWAGIQQEFGIPY	14	A31	1	48	3	579	631	0	3.21939	4.02083	0.276855
19	VKAACWWAGIQQEFGIPY	30	B15-rest	8	41	25	557	631	0	3.12183	4.34732	0.00230247
19	VKAACWWAGIQQEFGIPY	20	A43	6	43	24	558	631	0	2.57551	3.24419	0.0225895
19	VKAACWWAGIQQEFGIPY	37	B40	1	48	4	578	631	0	2.57551	3.01042	0.333369
19	VKAACWWAGIQQEFGIPY	23	A74	12	37	56	526	631	0	2.27251	3.04633	0.00338278	linkage with B1503
19	VKAACWWAGIQQEFGIPY	17	A34	9	40	43	539	631	0	2.22881	2.82035	0.0135565
20	PRTLNAWVKVIEEKAF	4	A07	1	72	0	558	631	0	8.64384	inf	0.115689
20	PRTLNAWVKVIEEKAF	25	B02	1	72	0	558	631	0	8.64384	inf	0.115689
20	PRTLNAWVKVIEEKAF	31	B1503	59	14	55	503	631	0	4.47356	38.5416	1.87385e-37
20	PRTLNAWVKVIEEKAF	59	C02	54	19	81	477	631	0	3.45753	16.7368	2.737e-25	strong linkage with B1503
20	PRTLNAWVKVIEEKAF	20	A43	9	64	21	537	631	0	2.59315	3.59598	0.00434783
20	PRTLNAWVKVIEEKAF	24	A80	3	70	7	551	631	0	2.59315	3.37347	0.0981556
20	PRTLNAWVKVIEEKAF	23	A74	20	53	48	510	631	0	2.5423	4.00943	1.61266e-05	linkage with B1503
20	PRTLNAWVKVIEEKAF	14	A31	1	72	3	555	631	0	2.16096	2.56944	0.389231
20	PRTLNAWVKVIEEKAF	44	B50	1	72	3	555	631	0	2.16096	2.56944	0.389231
20	PRTLNAWVKVIEEKAF	58	C01	1	72	3	555	631	0	2.16096	2.56944	0.389231
21	AVFIHNFKRKGGIGGYSA	4	A07	1	91	0	539	631	0	6.8587	inf	0.1458
21	AVFIHNFKRKGGIGGYSA	25	B02	1	91	0	539	631	0	6.8587	inf	0.1458
21	AVFIHNFKRKGGIGGYSA	34	B27	1	91	0	539	631	0	6.8587	inf	0.1458
21	AVFIHNFKRKGGIGGYSA	48	B54	1	91	0	539	631	0	6.8587	inf	0.1458
21	AVFIHNFKRKGGIGGYSA	31	B1503	81	11	33	506	631	0	4.87328	112.909	2.70107e-62
21	AVFIHNFKRKGGIGGYSA	59	C02	72	20	63	476	631	0	3.65797	27.2	1.73757e-38	strong linkage with B1503
21	AVFIHNFKRKGGIGGYSA	14	A31	2	90	2	537	631	0	3.42935	5.96667	0.103535
21	AVFIHNFKRKGGIGGYSA	58	C01	2	90	2	537	631	0	3.42935	5.96667	0.103535
21	AVFIHNFKRKGGIGGYSA	20	A43	14	78	16	523	631	0	3.20072	5.86699	1.54042e-05	linkage with B1503
22	YVDRFFKTLRAEQATQDV	9	A28	1	149	0	481	631	0	4.20667	inf	0.237718
22	YVDRFFKTLRAEQATQDV	29	B14	31	119	12	469	631	0	3.03271	10.1814	3.97731e-12
22	YVDRFFKTLRAEQATQDV	60	C03	61	89	27	454	631	0	2.91598	11.5248	3.64372e-23
23	GPKEPFRDYVDRFFKTLR	19	A39	1	128	0	502	631	0	4.89147	inf	0.204437
23	GPKEPFRDYVDRFFKTLR	14	A31	3	126	1	501	631	0	3.6686	11.9286	0.0284982
23	GPKEPFRDYVDRFFKTLR	71	C18	49	80	22	480	631	0	3.37581	13.3636	1.43912e-21
23	GPKEPFRDYVDRFFKTLR	60	C03	58	71	30	472	631	0	3.22393	12.8526	1.88419e-24
23	GPKEPFRDYVDRFFKTLR	37	B40	3	126	2	500	631	0	2.93488	5.95238	0.0606384
23	GPKEPFRDYVDRFFKTLR	54	B71	3	126	2	500	631	0	2.93488	5.95238	0.0606384
23	GPKEPFRDYVDRFFKTLR	18	A36	4	125	4	498	631	0	2.44574	3.984	0.0592459
23	GPKEPFRDYVDRFFKTLR	1	A01	28	101	29	473	631	0	2.40283	4.52168	3.12393e-07	strong linkage with C18
23	GPKEPFRDYVDRFFKTLR	56	B81	30	99	40	462	631	0	2.09635	3.5	5.46545e-06	strong linkage with C18
24	GKKAIGTVLVGPTPVNII	4	A07	1	40	0	590	631	0	15.3902	inf	0.0649762
24	GKKAIGTVLVGPTPVNII	25	B02	1	40	0	590	631	0	15.3902	inf	0.0649762
24	GKKAIGTVLVGPTPVNII	58	C01	1	40	3	587	631	0	3.84756	4.89167	0.23616
24	GKKAIGTVLVGPTPVNII	20	A43	6	35	24	566	631	0	3.07805	4.04286	0.00954789
24	GKKAIGTVLVGPTPVNII	37	B40	1	40	4	586	631	0	3.07805	3.6625	0.286108
24	GKKAIGTVLVGPTPVNII	67	C14	1	40	4	586	631	0	3.07805	3.6625	0.286108
24	GKKAIGTVLVGPTPVNII	31	B1503	22	19	92	498	631	0	2.97005	6.26773	9.04089e-08
24	GKKAIGTVLVGPTPVNII	59	C02	21	20	114	476	631	0	2.39404	4.38421	1.18668e-05	strong linkage with B1503
24	GKKAIGTVLVGPTPVNII	51	B5801	9	32	53	537	631	0	2.23407	2.84965	0.0131566
24	GKKAIGTVLVGPTPVNII	2	A02	18	23	108	482	631	0	2.19861	3.49275	0.000340398
25	EVNIVTDSQYALGII	36	B39	8	14	23	586	631	0	7.40176	14.559	2.64393e-06
25	EVNIVTDSQYALGII	29	B14	11	11	32	577	631	0	7.33721	18.0312	1.63789e-08
25	EVNIVTDSQYALGII	66	C12	7	15	23	586	631	0	6.69242	11.8899	2.76952e-05	strong linkage with B39
25	EVNIVTDSQYALGII	53	B67	1	21	4	605	631	0	5.73636	7.20238	0.163069
25	EVNIVTDSQYALGII	65	C08	13	9	60	549	631	0	5.10772	13.2167	5.12541e-08	strong linkage with B14
25	EVNIVTDSQYALGII	62	C05	1	21	8	601	631	0	3.18687	3.57738	0.274916
25	EVNIVTDSQYALGII	13	A3002	7	15	60	549	631	0	2.99661	4.27	0.00520222
25	EVNIVTDSQYALGII	68	C15	1	21	11	598	631	0	2.39015	2.58874	0.349281
26	WVKVIEEKAFSPEVIPMF	55	B72	1	40	0	590	631	0	15.3902	inf	0.0649762
26	WVKVIEEKAFSPEVIPMF	49	B57	19	22	21	569	631	0	7.31037	23.4004	1.54334e-14
26	WVKVIEEKAFSPEVIPMF	5	A11	1	40	2	588	631	0	5.13008	7.35	0.182808
26	WVKVIEEKAFSPEVIPMF	23	A74	14	27	54	536	631	0	3.16858	5.14678	2.67242e-05	linkage with B57
26	WVKVIEEKAFSPEVIPMF	37	B40	1	40	4	586	631	0	3.07805	3.6625	0.286108
26	WVKVIEEKAFSPEVIPMF	57	B82	1	40	4	586	631	0	3.07805	3.6625	0.286108
26	WVKVIEEKAFSPEVIPMF	67	C14	1	40	4	586	631	0	3.07805	3.6625	0.286108
26	WVKVIEEKAFSPEVIPMF	28	B13	5	36	22	568	631	0	2.85005	3.58586	0.0250982
26	WVKVIEEKAFSPEVIPMF	41	B45	7	34	35	555	631	0	2.56504	3.26471	0.014142
26	WVKVIEEKAFSPEVIPMF	8	A26	2	39	13	577	631	0	2.05203	2.27613	0.254022
26	WVKVIEEKAFSPEVIPMF	69	C16	9	32	59	531	631	0	2.03694	2.53125	0.0316431
27	IYPGIKVRQLCKLLRGAK	39	B42	28	5	112	486	631	0	3.82424	24.3	4.38319e-15
27	IYPGIKVRQLCKLLRGAK	37	B40	1	32	4	594	631	0	3.82424	4.64062	0.236204
27	IYPGIKVRQLCKLLRGAK	67	C14	1	32	4	594	631	0	3.82424	4.64062	0.236204
27	IYPGIKVRQLCKLLRGAK	70	C17	28	5	124	474	631	0	3.52233	21.4065	4.97066e-14	strong linkage with B42
27	IYPGIKVRQLCKLLRGAK	12	A3001	19	14	87	511	631	0	3.42739	7.97126	4.76242e-08	strong linkage with B42
27	IYPGIKVRQLCKLLRGAK	18	A36	1	32	7	591	631	0	2.39015	2.63839	0.350914
28	NYTPGPGVRYPLTFGWCF	4	A07	1	199	0	431	631	0	3.155	inf	0.316957
28	NYTPGPGVRYPLTFGWCF	25	B02	1	199	0	431	631	0	3.155	inf	0.316957
28	NYTPGPGVRYPLTFGWCF	35	B35	20	180	6	425	631	0	2.42692	7.87037	1.69056e-06
28	NYTPGPGVRYPLTFGWCF	47	B53	19	181	8	423	631	0	2.22019	5.55041	2.836e-05
28	NYTPGPGVRYPLTFGWCF	24	A80	7	193	3	428	631	0	2.2085	5.17444	0.0139856
29	EVGFPVRPQVPLRPMTFK	42	B47	2	215	0	414	631	0	2.90783	inf	0.117908
29	EVGFPVRPQVPLRPMTFK	4	A07	1	216	0	414	631	0	2.90783	inf	0.343899
29	EVGFPVRPQVPLRPMTFK	25	B02	1	216	0	414	631	0	2.90783	inf	0.343899
29	EVGFPVRPQVPLRPMTFK	53	B67	4	213	1	413	631	0	2.32627	7.75587	0.0500062
30	MASEFNLPPIVAKEIVA	37	B40	4	66	1	560	631	0	7.21143	33.9394	0.000641677
30	MASEFNLPPIVAKEIVA	45	B51	4	66	4	557	631	0	4.50714	8.43939	0.0069096
30	MASEFNLPPIVAKEIVA	42	B47	1	69	1	560	631	0	4.50714	8.11594	0.20972
30	MASEFNLPPIVAKEIVA	39	B42	50	20	90	471	631	0	3.21939	13.0833	3.7665e-21
30	MASEFNLPPIVAKEIVA	68	C15	4	66	8	553	631	0	3.00476	4.18939	0.0345597
30	MASEFNLPPIVAKEIVA	5	A11	1	69	2	559	631	0	3.00476	4.05072	0.297669
30	MASEFNLPPIVAKEIVA	70	C17	48	22	104	457	631	0	2.84662	9.58741	3.66773e-17	strong linkage with B42
30	MASEFNLPPIVAKEIVA	15	A32	3	67	8	553	631	0	2.45844	3.09515	0.112533
30	MASEFNLPPIVAKEIVA	16	A33	8	62	22	539	631	0	2.40381	3.16129	0.0120713
30	MASEFNLPPIVAKEIVA	8	A26	4	66	11	550	631	0	2.40381	3.0303	0.0737307
31	GATPQDLNTMLNTVGGH	53	B67	5	175	0	451	631	0	3.50556	inf	0.00181461
31	GATPQDLNTMLNTVGGH	19	A39	1	179	0	451	631	0	3.50556	inf	0.285261
31	GATPQDLNTMLNTVGGH	66	C12	22	158	8	443	631	0	2.57074	7.71044	2.3335e-07	strong linkage with B39
31	GATPQDLNTMLNTVGGH	36	B39	22	158	9	442	631	0	2.48781	6.83826	6.02927e-07
31	GATPQDLNTMLNTVGGH	56	B81	49	131	21	430	631	0	2.45389	7.65903	1.89092e-14
31	GATPQDLNTMLNTVGGH	39	B42	95	85	45	406	631	0	2.37877	10.0837	4.32266e-29
31	GATPQDLNTMLNTVGGH	1	A01	37	143	20	431	631	0	2.27554	5.57587	3.68019e-09	strong linkage with B81
31	GATPQDLNTMLNTVGGH	70	C17	96	84	56	395	631	0	2.21404	8.06122	1.69974e-25	strong linkage with B42
32	GIKQLQTRVLAIERYLK	52	B5802	36	3	96	496	631	0	4.41259	62	2.69854e-23
32	GIKQLQTRVLAIERYLK	45	B51	2	37	6	586	631	0	4.04487	5.27928	0.0823115
32	GIKQLQTRVLAIERYLK	44	B50	1	38	3	589	631	0	4.04487	5.16667	0.225723
32	GIKQLQTRVLAIERYLK	63	C06	37	2	156	436	631	0	3.10177	51.7051	2.76624e-18	strong linkage with B5802
32	GIKQLQTRVLAIERYLK	20	A43	5	34	25	567	631	0	2.69658	3.33529	0.0314834
32	GIKQLQTRVLAIERYLK	21	A66	10	29	59	533	631	0	2.34485	3.11514	0.00600829
32	GIKQLQTRVLAIERYLK	41	B45	6	33	36	556	631	0	2.31136	2.80808	0.0374686
32	GIKQLQTRVLAIERYLK	50	B58	1	38	7	585	631	0	2.02244	2.19925	0.401507
	A-list epitopes
	not on A-list; in linkage with an A-list allele
